# Supplementary material for: Perceived Physical Fatigability Predicts All-Cause Mortality in Older Adults
Source: PubMed Central journal article supplement — J Gerontol A Biol Sci Med Sci. 2021 Dec 15;77(4):837–41. doi: 10.1093/gerona/glab374 (PMC8974332; doi:10.1093/gerona/glab374), 2021-12-15
Supplement: glab374_suppl_supplementary_material.pdf [file glab374_suppl_supplementary_material.pdf]

**Online Only Supplement:**

**Perceived Physical Fatigability Predicts All-Cause Mortality in Older Adults**

Nancy W. Glynn, PhD<sup>1</sup>, Theresa Gmelin, MSW, MPH<sup>1</sup>, Sharon W. Renner, PhD<sup>2</sup>, Yujia (Susanna) Qiao, ScM<sup>1</sup>, Robert M. Boudreau, PhD<sup>1</sup>, Mary F. Feitosa, PhD<sup>3</sup>, Mary K. Wojczynski, PhD<sup>3</sup>, Stephanie Cosentino, PhD<sup>4</sup>, Stacy L. Andersen, PhD<sup>5</sup>, Kaare Christensen, MD<sup>6</sup>, and Anne B. Newman, MD<sup>1</sup>; for the LLFS Research Group

eTable 1: Visit 2 Participant Characteristics by Survival Status (N=2,258)

eTable 2. Comparison of Visit 2 Participant Characteristics by Complete (N=2,258) versus Incomplete Data Excluded from Analysis (N=339)

eFigure 1. Mean Pittsburgh Fatigability Scale (PFS) Physical Scores (0-50) at Visit 2 by Vital Status across Age Strata (N=2,258)

**eTable 1. Comparison of Visit 2 Participant Characteristics by Complete (N=2,258) versus Incomplete Data Excluded from Analysis (N=339)**

|                                                  | <b>Complete Data<br/>(N = 2258)</b> | <b>Incomplete Data<sup>a</sup><br/>(N = 339 )</b> | <b>P-Value</b> |
|--------------------------------------------------|-------------------------------------|---------------------------------------------------|----------------|
| Number of Deaths                                 | 230 (10.2 )                         | 57 (19.1) [n=287]                                 | <.0001         |
| Age, years                                       | 73.5 ± 10.4                         | 80.7                                              | <.0001         |
| Sex, women                                       | 1235 (54.7)                         | 204 (60.2)                                        | .06            |
| PFS Physical score, 0-50                         | 14.4 ± 10.0                         | 15.2 ± 11.4 [n=84]                                | .47            |
| Physical Activity,<br>MET-hours/day <sup>b</sup> | 36.4 ± 7.0                          | 35.2±10.1 [n=170]                                 | .13            |
| Heart Disease <sup>c</sup>                       | 143 (6.3)                           | 33 (9.7)                                          | .02            |
| Hypertension <sup>d</sup>                        | 1354 (60.0)                         | 238 (70.2)                                        | .0004          |
| Stroke <sup>c</sup>                              | 115 (5.1)                           | 32 (9.4)                                          | .0012          |
| Kidney Disease <sup>c</sup>                      | 75 (3.3)                            | 11 (3.24)                                         | .94            |
| Diabetes <sup>e</sup>                            | 252 (11.2)                          | 42 (12.8) [n=328]                                 | .38            |
| Peripheral Arterial<br>Disease <sup>c</sup>      | 53 (2.4)                            | 7 (2.1)                                           | .74            |
| Liver Disease <sup>c</sup>                       | 65 (2.9)                            | 8 (2.4)                                           | .59            |
| Lung Disease <sup>c</sup>                        | 306 (13.6)                          | 45 (13.3)                                         | .89            |
| Cancer (excluding skin) <sup>c</sup>             | 563 (25.0)                          | 87 (25.7)                                         | .77            |
| Depressive<br>Symptomatology, 0-30 <sup>f</sup>  | 3.2 ± 3.5 [n=2185]                  | 3.6±3.8 [n=284]                                   | .13            |
| Smoking Status                                   |                                     |                                                   |                |
| Former Smoker                                    | 877 (38.8)                          | 98 (34.0) [n=288]                                 | .12            |
| Current Smoker                                   | 87 (3.9)                            | 19 (6.6) [n=288]                                  | .28            |
| Non-Smoker                                       | 1284 (57.3)                         | 171 (59.3) [n=288]                                | .50            |

All reported in mean ± standard deviation or n (%)

<sup>a</sup>Incomplete data included those missing one of more of the following variables: Pittsburgh Fatigability Scale (PFS) that were not imputable (n=255), lost to follow-up (n=137), physical activity (n=169), health conditions (n=11) and smoking (n=15); <sup>b</sup>Framingham Physical Activity Index score; <sup>c</sup>Self-reported doctor diagnosis (prevalence/history); <sup>d</sup>Hypertension defined as systolic ≥130 mmHg and/or diastolic ≥80 mmHg or taking blood pressure medication; <sup>e</sup>Hemoglobin A1c ≥6.5%, fasting glucose ≥126, or self-reported doctor diagnosis defined diabetes; <sup>f</sup>Center for Epidemiological Studies – Depression Scale

**eTable 2: Visit 2 Participant Characteristics by Survival Status (N=2,258)**

|                                                  | All<br>(N = 2258) | Living<br>(n =2028)     | Deceased<br>(n = 230)   | P-Value |
|--------------------------------------------------|-------------------|-------------------------|-------------------------|---------|
| Age, years                                       | 73.5 ± 10.4       | 71.6 ± 8.4              | 91.0 ± 10.9             | <.0001  |
| Sex, women                                       | 1235 (54.7)       | 1119 (55.2)             | 116 (50.4)              | .17     |
| PFS Physical score, 0-50                         | 14.4 ± 10.0       | 12.2 ± 0.4 <sup>a</sup> | 19.1 ± 0.8 <sup>a</sup> | <.0001  |
| PFS Physical score<br>Severity Strata            |                   |                         |                         | <.0001  |
| 0 to 4                                           | 358 (15.9)        | 353 (98.6)              | 5 (1.4)                 |         |
| 5 to 9                                           | 460 (20.4)        | 448 (97.4)              | 12 (2.6)                |         |
| 10 to 14                                         | 492 (21.8)        | 475 (96.5)              | 17 (3.5)                |         |
| 15 to 19                                         | 326 (14.4)        | 304 (93.3)              | 22 (6.8)                |         |
| 20 to 24                                         | 257 (11.4)        | 230 (89.5)              | 27 (10.5)               |         |
| ≥25                                              | 365 (16.2)        | 218 (59.7)              | 147 (40.3)              |         |
| Physical Activity,<br>MET-hours/day <sup>b</sup> | 36.4 ± 7.0        | 37.1 ± 6.8              | 29.7 ± 5.6              | <.0001  |
| Heart Disease <sup>c</sup>                       | 143 (6.3)         | 103 (5.1)               | 40 (17.4)               | <.0001  |
| Hypertension <sup>d</sup>                        | 1354 (60.0)       | 1221 (60.2)             | 133 (58.0)              | .48     |
| Stroke <sup>c</sup>                              | 115 (5.1)         | 72 (3.6)                | 43 (18.7)               | <.0001  |
| Kidney Disease <sup>c</sup>                      | 76 (3.4)          | 58 (2.8)                | 18 (8.9)                | <.0001  |
| Diabetes <sup>c</sup>                            | 252 (11.2)        | 215 (10.6)              | 37 (16.1)               | .01     |
| Peripheral Arterial<br>Disease <sup>d</sup>      | 53 (2.4)          | 27 (1.3)                | 26 (11.3)               | <.0001  |
| Liver Disease <sup>c</sup>                       | 65 (2.9)          | 62 (3.1)                | 3 (1.3)                 | .13     |
| Lung Disease <sup>c</sup>                        | 306 (13.6)        | 263 (13.0)              | 43 (18.7)               | .02     |
| Cancer (excluding skin) <sup>c</sup>             | 563 (25.0)        | 471 (23.2)              | 92 (40.0)               | <.0001  |
| Depressive<br>Symptomatology, 0-30 <sup>f</sup>  | 3.2 ± 3.5         | 3.1 ± 3.3               | 5.0 ± 4.5               | <.0001  |
| Smoking Status                                   |                   |                         |                         |         |
| Former Smoker                                    | 877 (38.8)        | 785 (38.7)              | 92 (40.0)               | .70     |
| Current Smoker                                   | 87 (3.85)         | 82 (4.0)                | 5 (2.2)                 | .16     |
| Non-Smoker                                       | 1294 (57.3)       | 1161 (57.3)             | 133 (57.8)              | .87     |

All reported as mean ± standard deviation or n (%); <sup>a</sup>Age-adjusted mean ± standard error; <sup>b</sup>Framingham Physical Activity Index score; <sup>c</sup>Self-reported doctor diagnosis (prevalence/history); <sup>d</sup>Hypertension defined as systolic ≥130 mmHg and/or diastolic ≥80 mmHg or taking blood pressure medication; <sup>e</sup>Hemoglobin A1c ≥6.5%, fasting glucose ≥126, or self-reported doctor diagnosis defined diabetes; <sup>f</sup>Center for Epidemiological Studies – Depression Scale

**eFigure 1. Mean Pittsburgh Fatigability Scale (PFS) Physical Scores (0-50) at Visit 2 by Vital Status across Age Strata\* (N=2,258)**

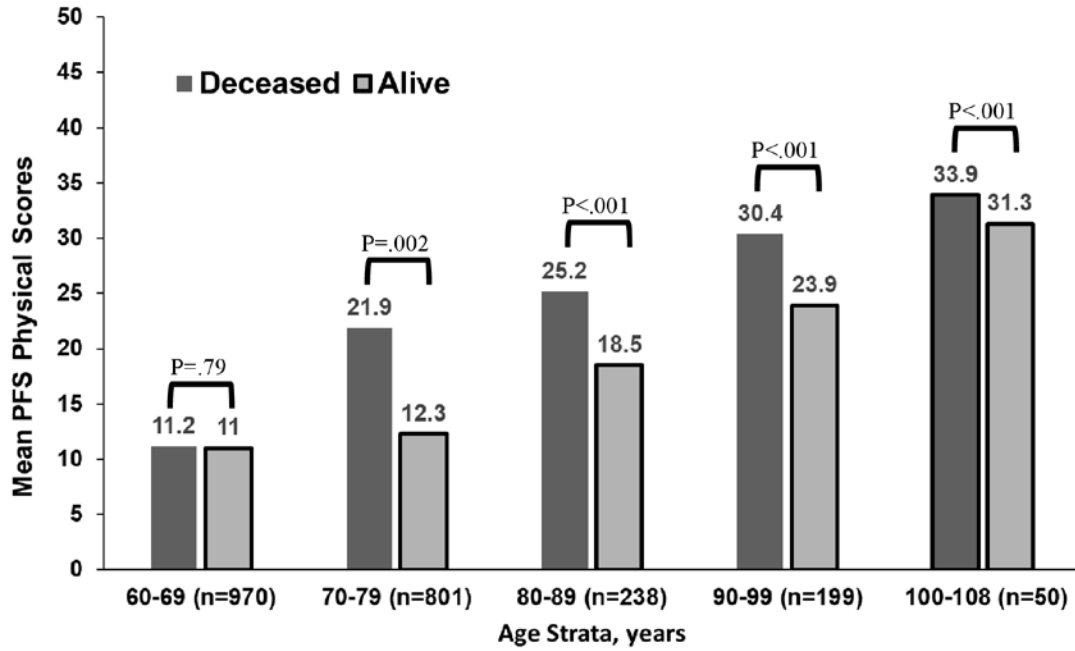

|                  | Total | 60-69 years | 70-79 years | 80-89 years | 90-99 years | 100-108 years | P-trend |
|------------------|-------|-------------|-------------|-------------|-------------|---------------|---------|
| Number of deaths | 230   | 16          | 25          | 42          | 104         | 43            | <0.001  |

\*Generalized estimating equations with an exchangeable covariance matrix was used to examine PFS Physical scores by vital status within each age strata. All p-values accounted for family relatedness and were adjusted for field center.
